# Supplementary material
Source: PubMed Central journal article supplement (PMC4083123)
Supplement: supp_M114.038455_mcp.M114.038455-1.pdf [file supp_M114.038455_mcp.M114.038455-1.pdf]

**Supplemental Figures 1-5 (General Description):** Raw, baseline subtracted, and charge deconvoluted mass spectra for the spectra shown in Fig. 1. Tables of observed and calculated  $m/z$  values are provided as Supplemental Tables 1-5. For albumin, the Bruker Daltonics charge deconvolution algorithm took into account a minimum of the 20 most abundant charge states, summing the raw signal surrounding each individual peak. This procedure results in the simultaneous enhancement of signal/noise for true peaks and the canceling of noise or inconsistent baseline anomalies. For apoA-I, a minimum of at least the 5 most abundant charge states were used in the deconvolution algorithm. PH indicates peak height.

**Supplemental Figure 1:** Albumin from a fresh, never frozen EDTA plasma sample provided by a healthy donor.

**Supplemental Figure 2:** ApoA-I from the same fresh, never frozen EDTA plasma sample provided by a healthy donor.

**Supplemental Figure 3:** Albumin from the same sample shown in Supp. Figs. 1-2, aged for 60 days at -20 °C.

**Supplemental Figure 4:** ApoA-I from the same sample shown in Supp. Figs. 1-2, aged for 11 days at 25 °C.

**Supplemental Figure 5:** ApoA-I from a healthy donor sample purchased from a for-profit biobank, aged for 4 years under unspecified “frozen” conditions. No peaks corresponding to albumin are observed in the raw spectrum because data from this particular sample were acquired by pre-isolation of apoA-I by mass spectrometric immunoassay (MSIA) [Niederkofler, E. E. et al. (2003) Novel mass spectrometric immunoassays for the rapid structural characterization of plasma apolipoproteins. *J Lipid Res* 44, 630-639]. When samples are injected onto the LC-MS immediately after immunocapture, MSIA does not result in any artifactual oxidation. No other data collected for this study were acquired by MSIA. This spectrum was included because the data from this spectrum served as one of the initial impetuses for this study.

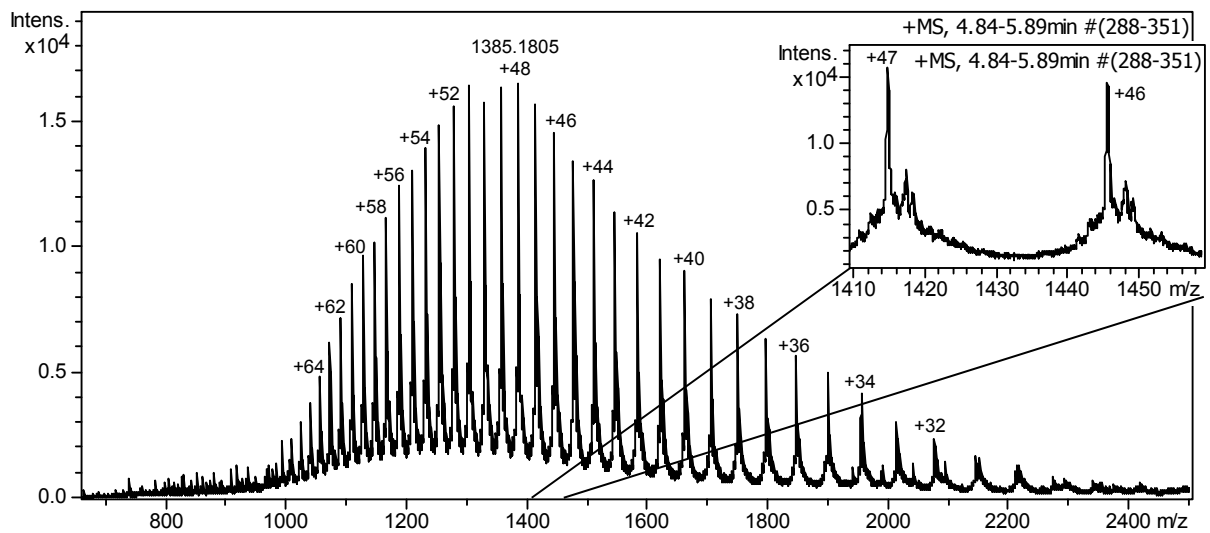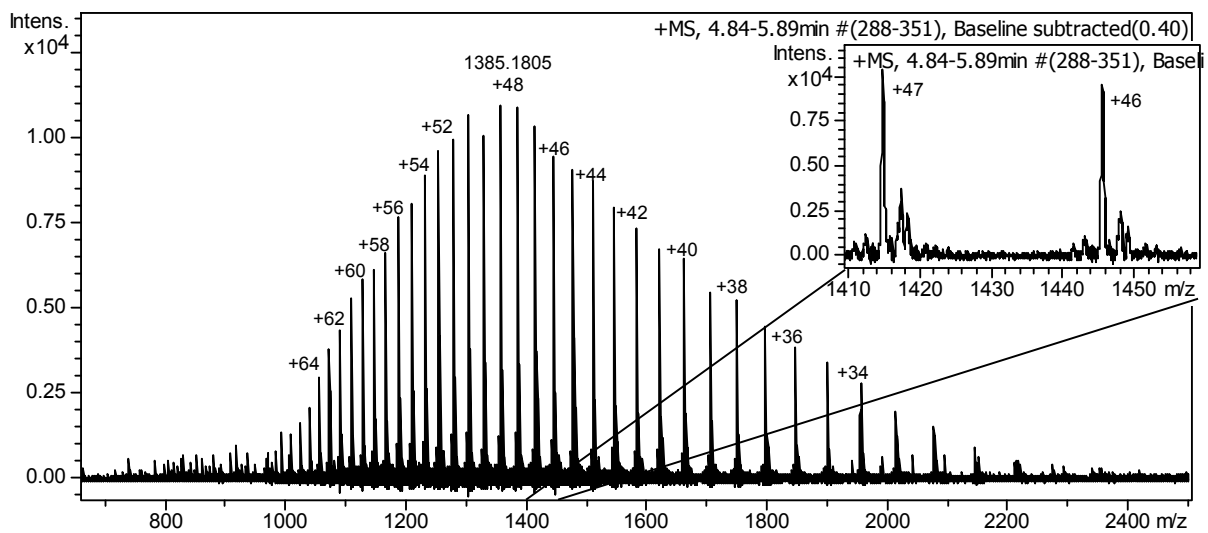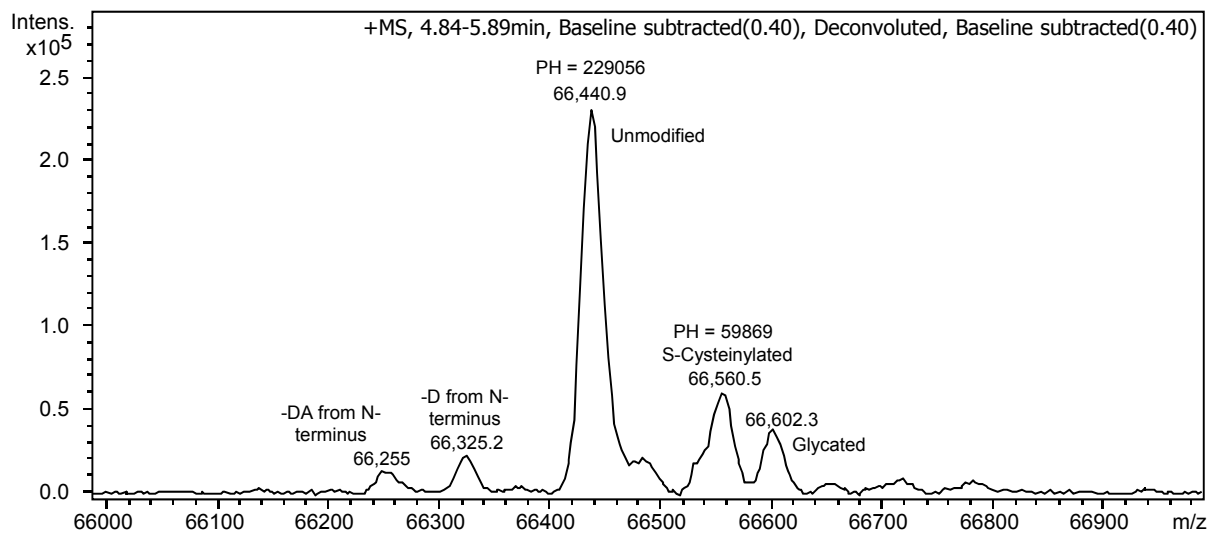

Supplemental Figure 1

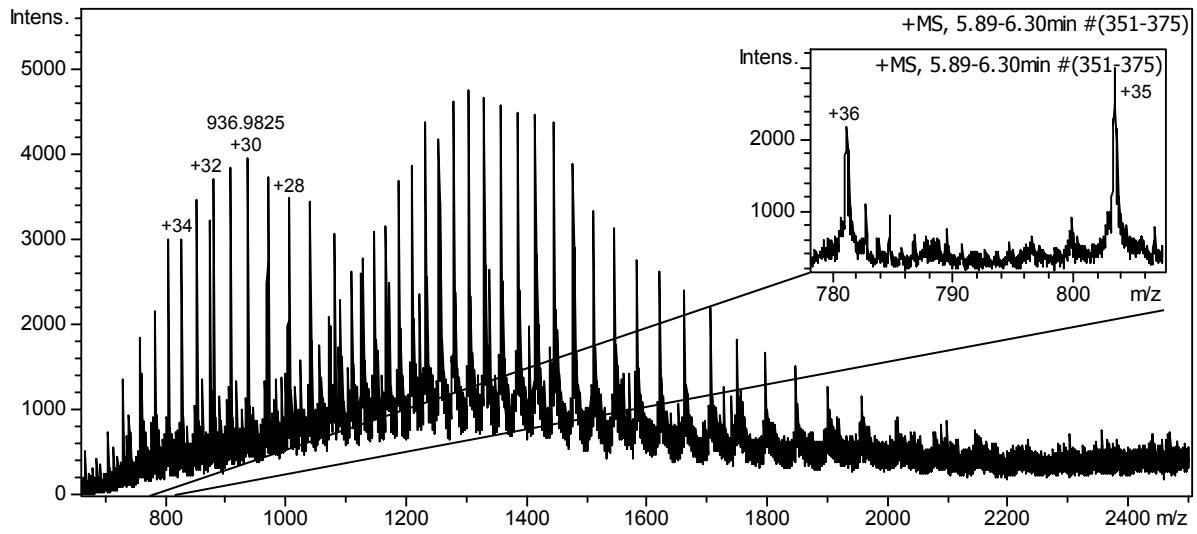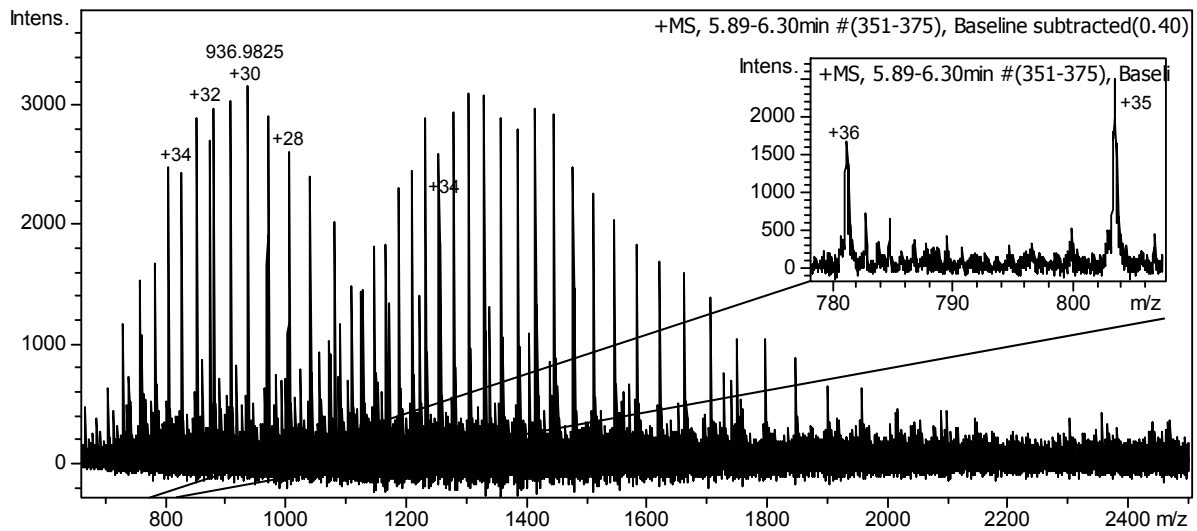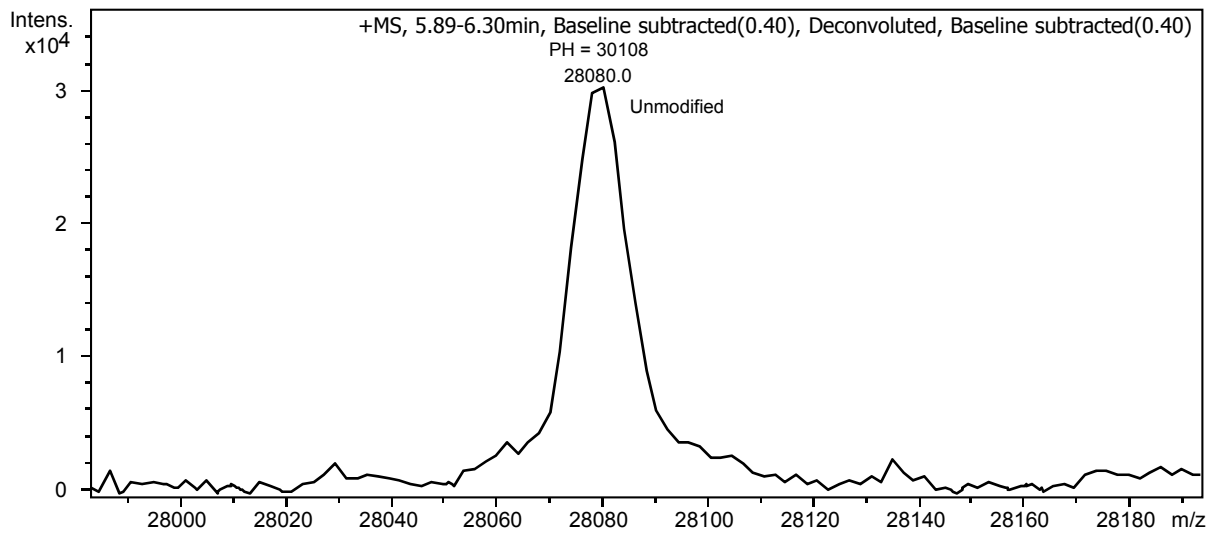

Supplemental Figure 2

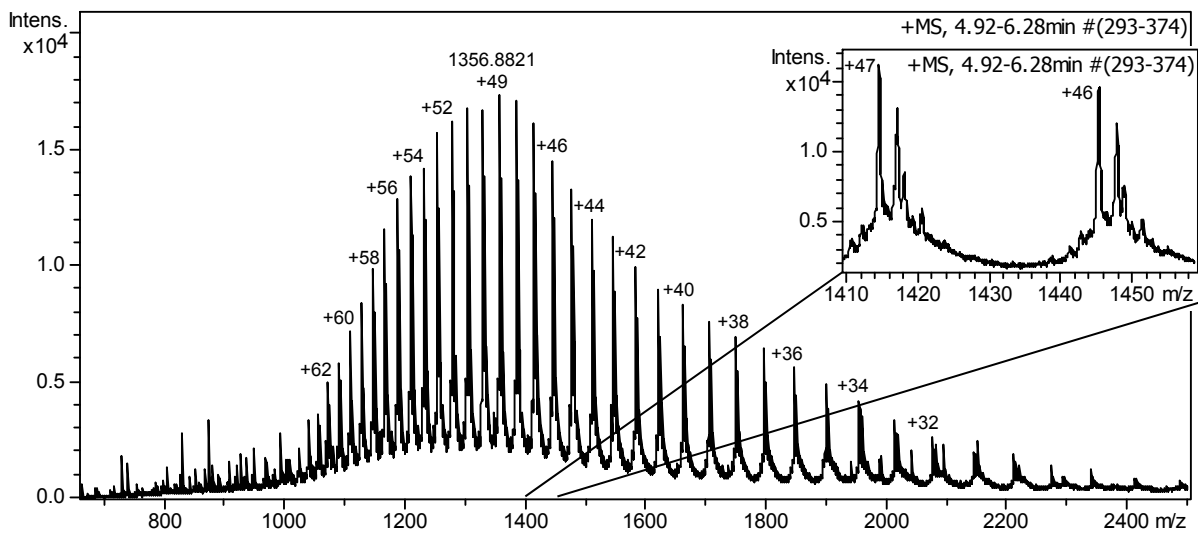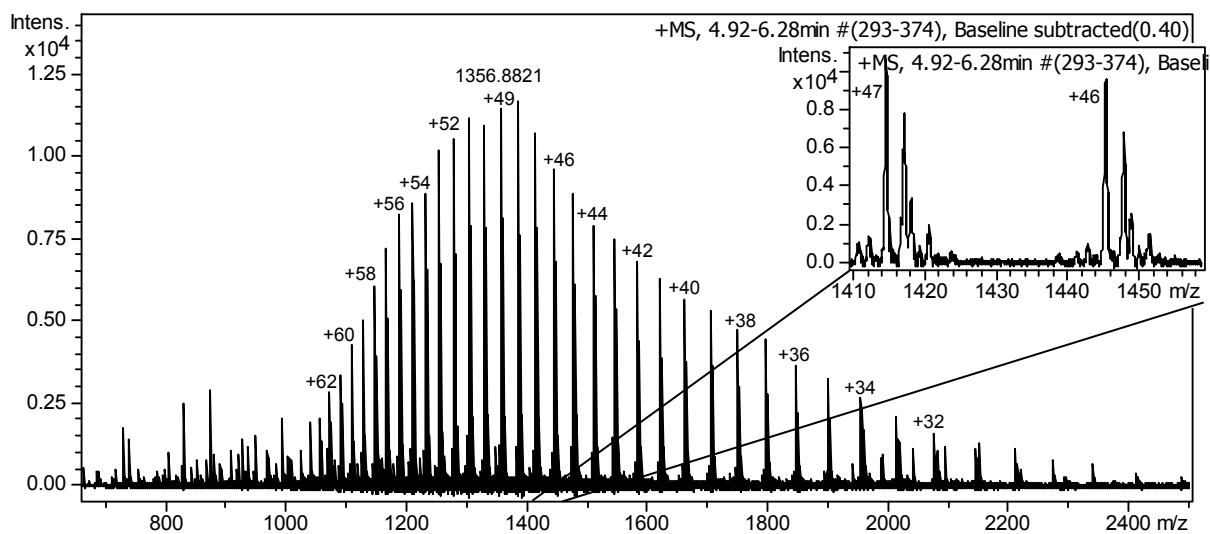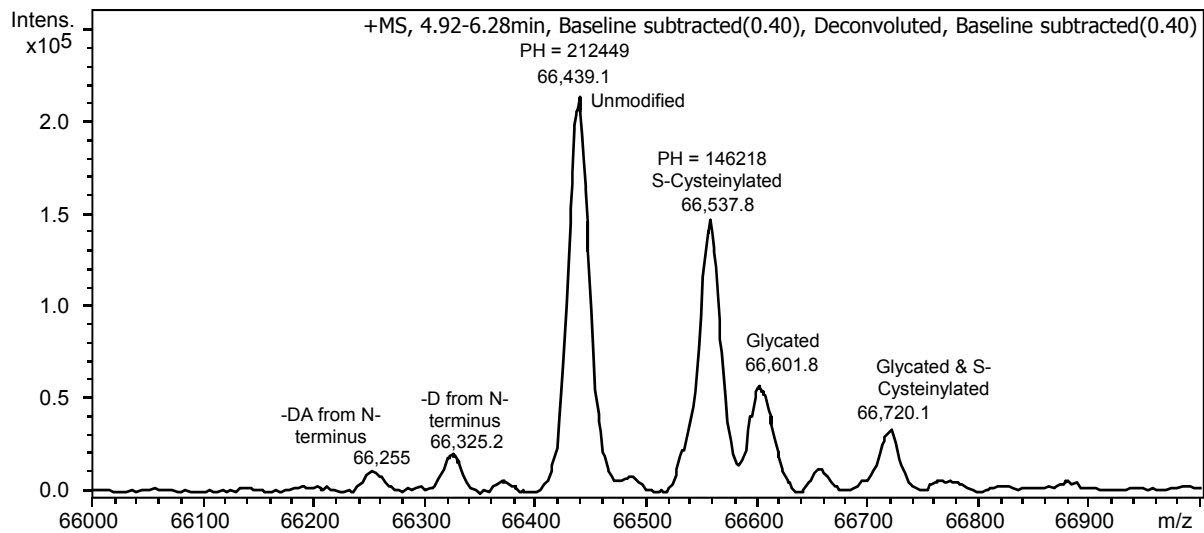

Supplemental Figure 3

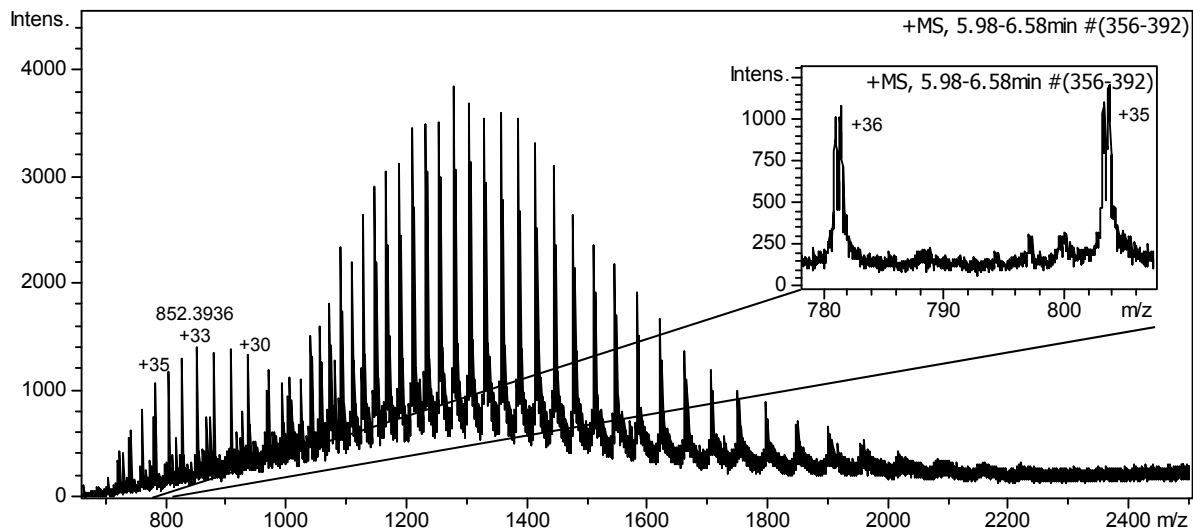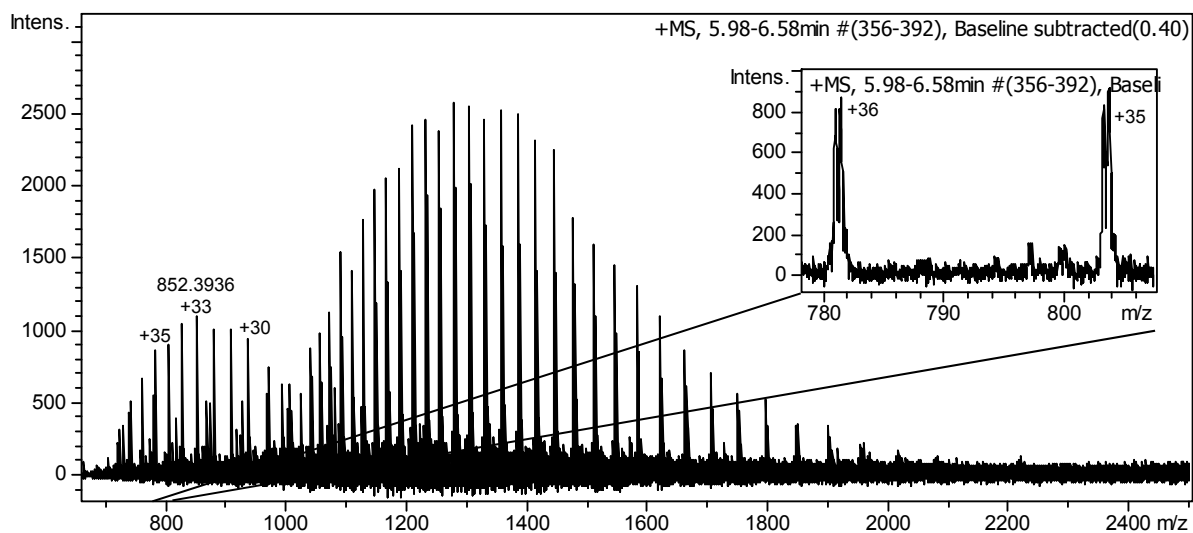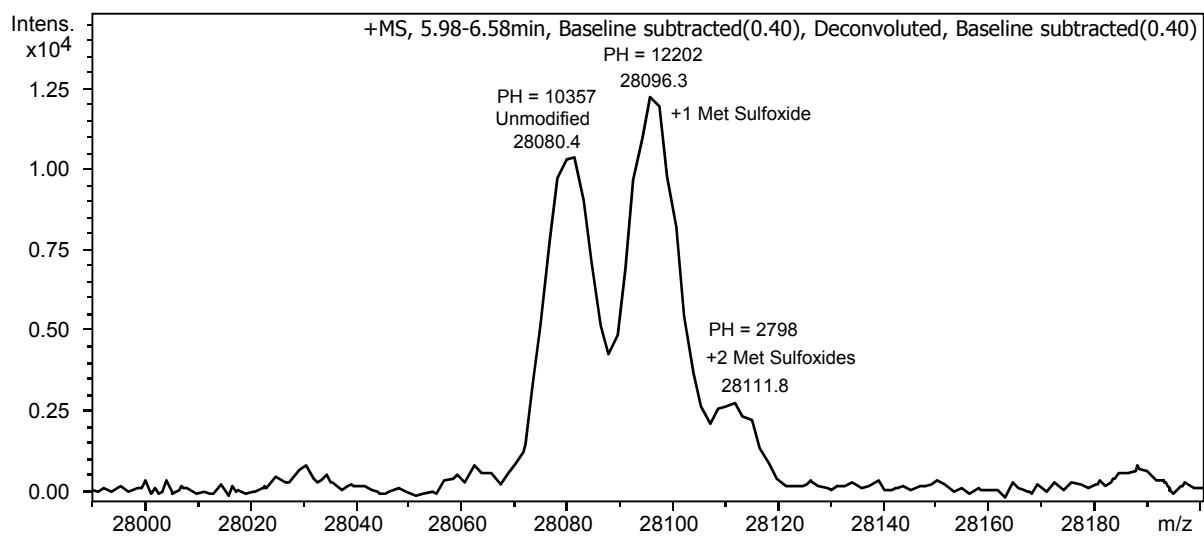

Supplemental Figure 4

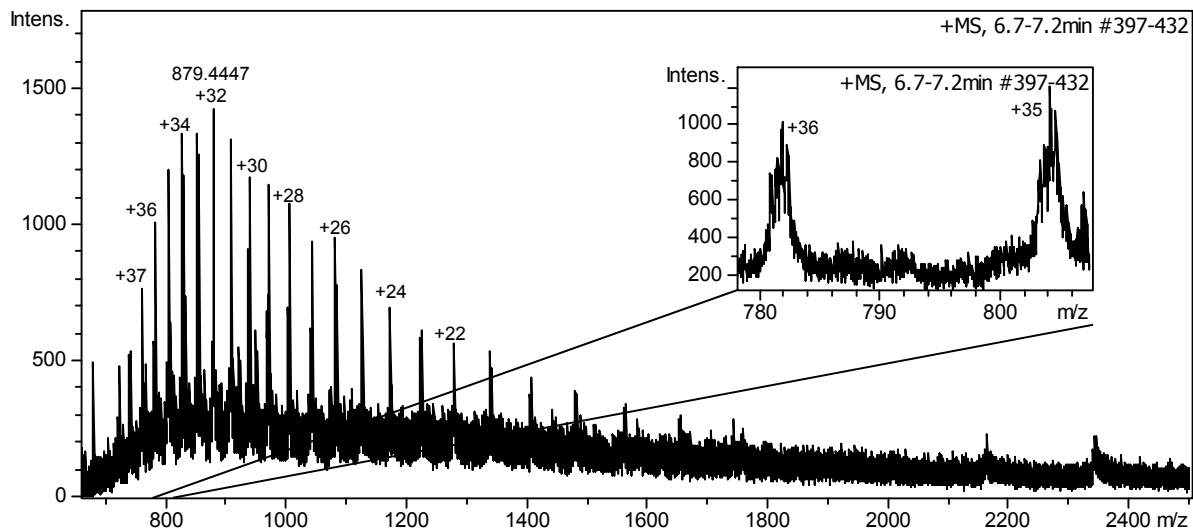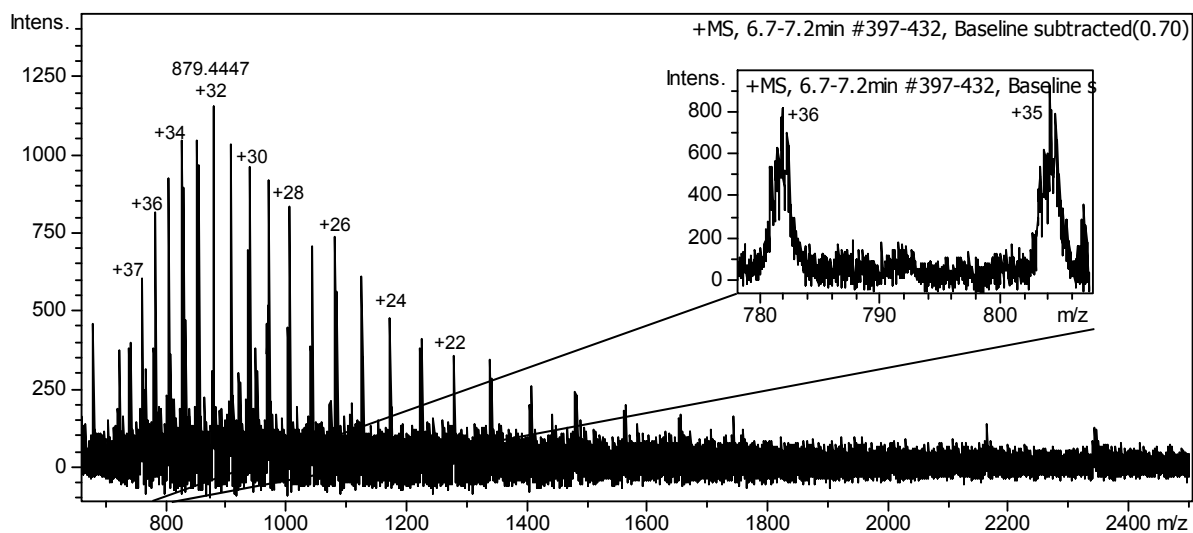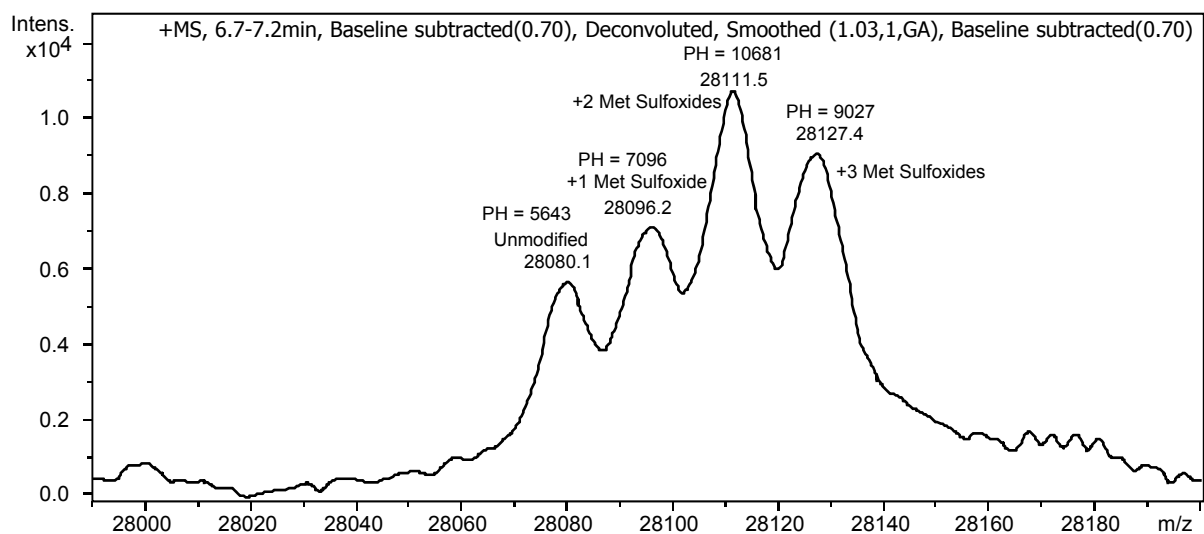

Supplemental Figure 5

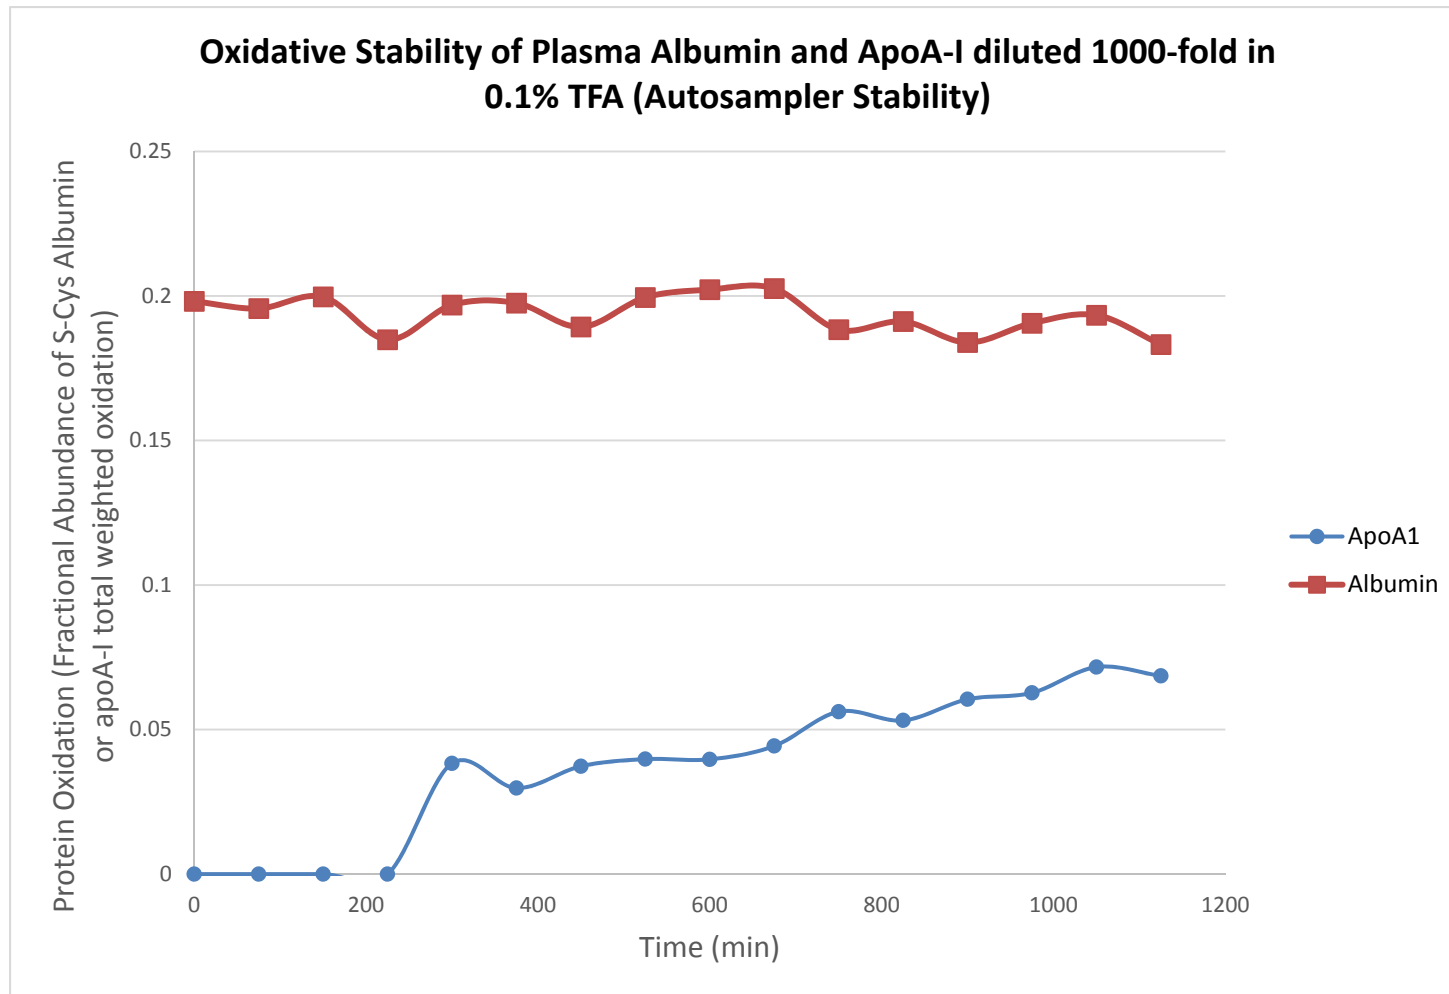

**Supplemental Figure 6:** Autosampler stability of albumin and apoA-I diluted 1000-fold in 0.1% trifluoroacetic acid and placed on an autosampler at 10 °C. The time frame shown is that required to analyze 96 samples using the methodology described here. Albumin S-cysteinylation was stable, but apoA-I methionine oxidation was not.

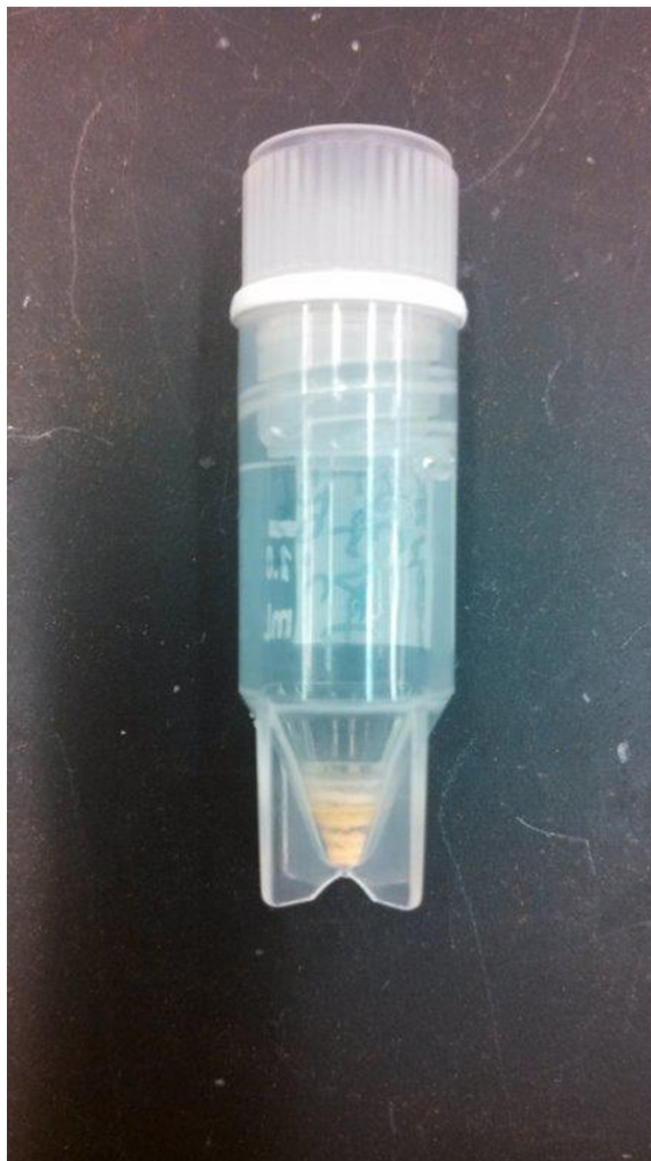

**Supplemental Figure 7:** Photograph illustrating plasma sample dehydration from storage in an auto defrost freezer.



## Albumin Oxidation at -20 °C is Independent of Vial Headspace / Degree of Sealing

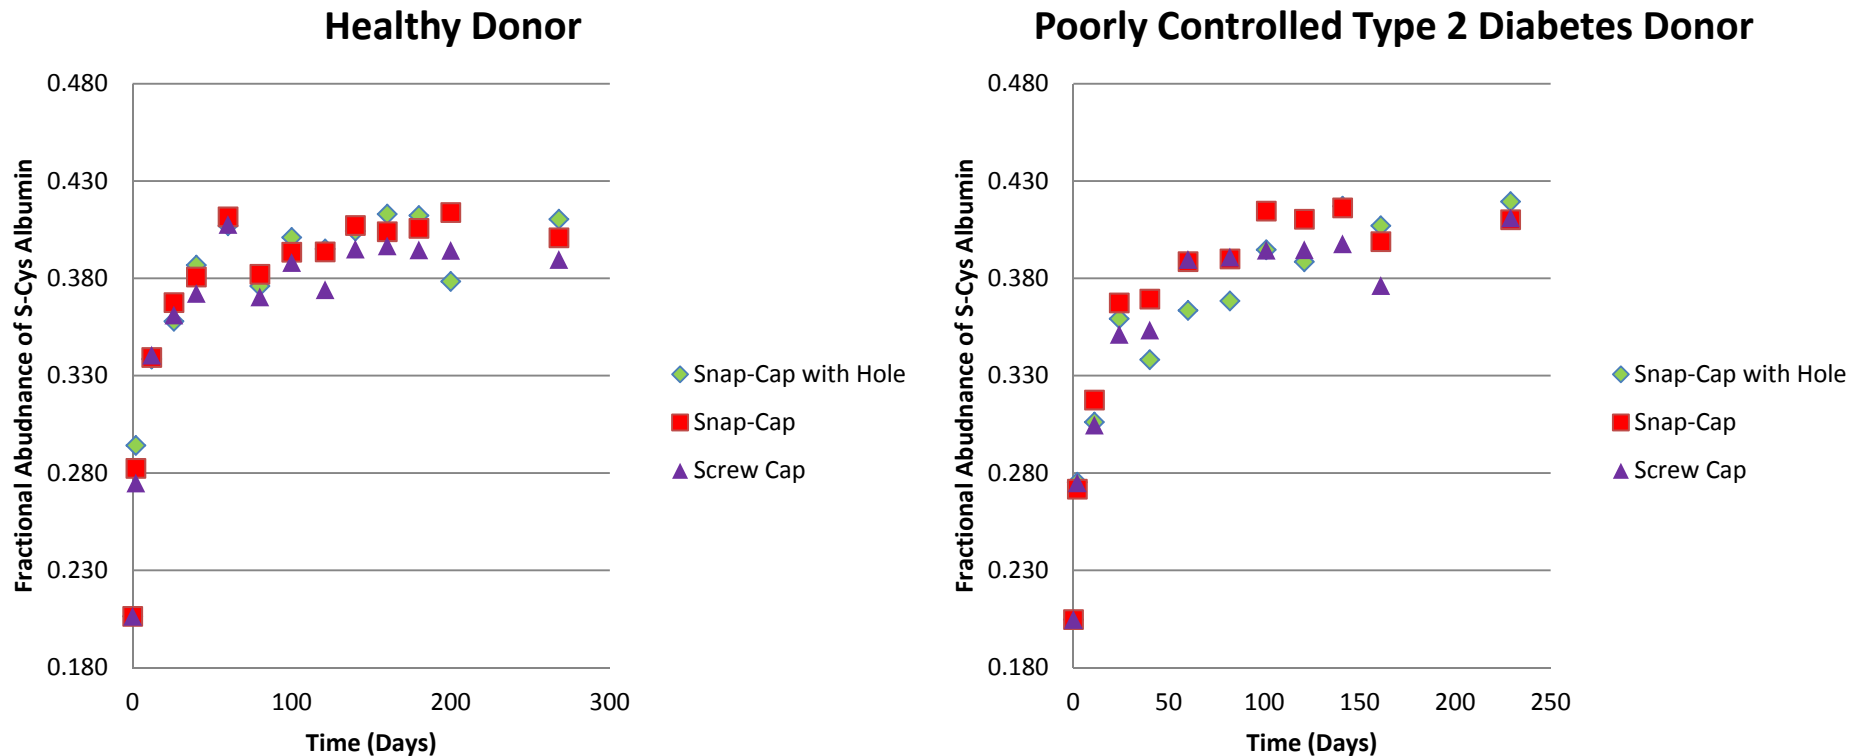

**Supplemental Figure 8:** Albumin oxidation (S-cysteinylation) in the samples from the healthy donor and poorly controlled type 2 diabetic stored in a manual defrost freezer at -20 °C. Data are the same as in Fig. 2, but replicates are separated out with regard to storage vessel type.

## ApoA-I Oxidation at -20 °C is not Determined by Vial Headspace / Degree of Sealing

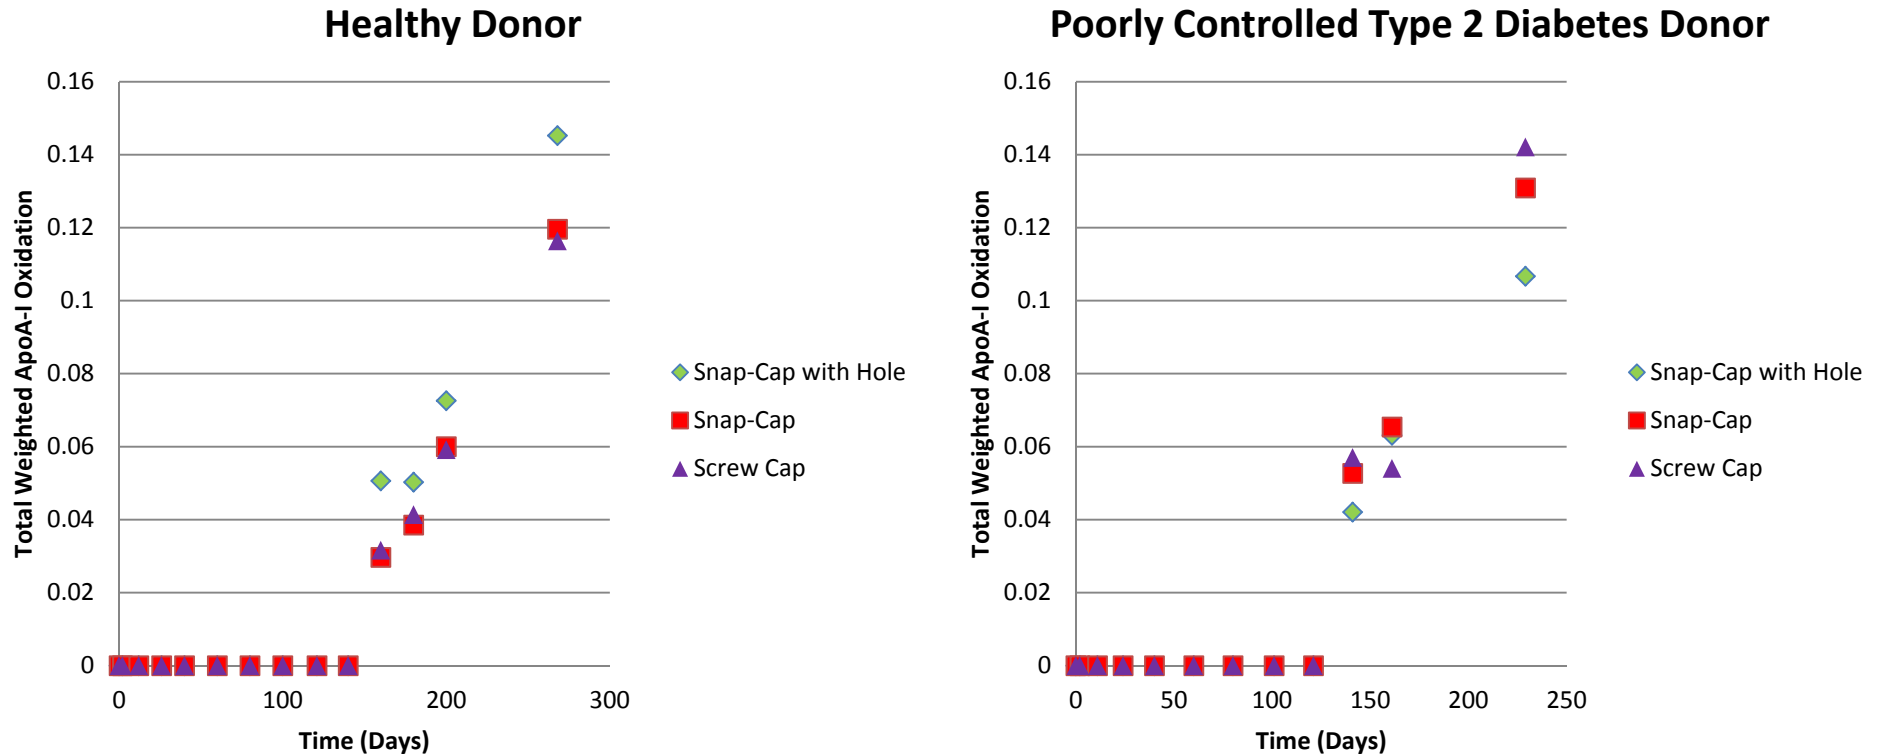

**Supplemental Figure 9:** ApoA-I methionine oxidation in the samples from the healthy donor and poorly controlled type 2 diabetic stored in a manual defrost freezer at -20 °C. Data are the same as in Fig. 3, but replicates are separated out with regard to storage vessel type.

**Supplemental Table 1: Mass Table for Supplemental Figure 1**  
 – Albumin at time zero from a healthy donor. Only the  $m/z$  values corresponding to the base peak in the charge deconvoluted spectrum are shown.

|                |                     | Observed       | Calculated     | Observed                                | Calculated                              |
|----------------|---------------------|----------------|----------------|-----------------------------------------|-----------------------------------------|
|                | <i>Charge State</i> | <i>Raw m/z</i> | <i>Raw m/z</i> | <i>Deconvoluted MH<sup>+</sup> Mass</i> | <i>Deconvoluted MH<sup>+</sup> Mass</i> |
| <b>Albumin</b> | +65                 | 1,023.1604     | 1,023.1215     | <b>66,440.9</b>                         | <b>66,438.9</b>                         |
|                | +64                 | 1,039.1096     | 1,039.0922     |                                         |                                         |
|                | +63                 | 1,055.5693     | 1,055.5698     |                                         |                                         |
|                | +62                 | 1,072.6320     | 1,072.5790     |                                         |                                         |
|                | +61                 | 1,090.1919     | 1,090.1459     |                                         |                                         |
|                | +60                 | 1,108.3717     | 1,108.2983     |                                         |                                         |
|                | +59                 | 1,127.1101     | 1,127.0661     |                                         |                                         |
|                | +58                 | 1,146.5066     | 1,146.4810     |                                         |                                         |
|                | +57                 | 1,166.6453     | 1,166.5772     |                                         |                                         |
|                | +56                 | 1,187.4467     | 1,187.3911     |                                         |                                         |
|                | +55                 | 1,208.9789     | 1,208.9618     |                                         |                                         |
|                | +54                 | 1,231.3553     | 1,231.3315     |                                         |                                         |
|                | +53                 | 1,254.6126     | 1,254.5453     |                                         |                                         |
|                | +52                 | 1,278.7039     | 1,278.6519     |                                         |                                         |
|                | +51                 | 1,303.7446     | 1,303.7039     |                                         |                                         |
|                | +50                 | 1,329.8544     | 1,329.7580     |                                         |                                         |
|                | +49                 | 1,356.9385     | 1,356.8755     |                                         |                                         |
|                | +48                 | 1,385.1805     | 1,385.1229     |                                         |                                         |
|                | +47                 | 1,414.6435     | 1,414.5723     |                                         |                                         |
|                | +46                 | 1,445.3864     | 1,445.3022     |                                         |                                         |
|                | +45                 | 1,477.4614     | 1,477.3978     |                                         |                                         |
|                | +44                 | 1,511.0278     | 1,510.9523     |                                         |                                         |
|                | +43                 | 1,546.0870     | 1,546.0674     |                                         |                                         |
|                | +42                 | 1,582.8779     | 1,582.8548     |                                         |                                         |
|                | +41                 | 1,621.4989     | 1,621.4366     |                                         |                                         |
|                | +40                 | 1,661.9439     | 1,661.9475     |                                         |                                         |
|                | +39                 | 1,704.6050     | 1,704.5359     |                                         |                                         |
|                | +38                 | 1,749.4310     | 1,749.3658     |                                         |                                         |
|                | +37                 | 1,796.5972     | 1,796.6189     |                                         |                                         |
|                | +36                 | 1,846.4743     | 1,846.4972     |                                         |                                         |
| +35            | 1,899.2539          | 1,899.2257     |                |                                         |                                         |
| +34            | 1,955.0667          | 1,955.0559     |                |                                         |                                         |
| +33            | 2,014.3384          | 2,014.2697     |                |                                         |                                         |
| +32            | 2,077.1730          | 2,077.1844     |                |                                         |                                         |
| +31            | 2,144.1840          | 2,144.1581     |                |                                         |                                         |

**Supplemental Table 2:** Mass Table for Supplemental Figure 2 – ApoA-I at time zero from a healthy donor. Only the *m/z* values corresponding to the base peak in the charge deconvoluted spectrum are shown.

|               |                     | Observed       | Calculated     | Observed                                | Calculated                              |
|---------------|---------------------|----------------|----------------|-----------------------------------------|-----------------------------------------|
|               | <i>Charge State</i> | <i>Raw m/z</i> | <i>Raw m/z</i> | <i>Deconvoluted MH<sup>+</sup> Mass</i> | <i>Deconvoluted MH<sup>+</sup> Mass</i> |
| <b>ApoA-I</b> | +36                 | 780.9446       | 780.9611       | <b>28,080.0</b>                         | <b>28,079.6</b>                         |
|               | +35                 | 803.2088       | 803.2457       |                                         |                                         |
|               | +34                 | 826.8395       | 826.8412       |                                         |                                         |
|               | +33                 | 851.8577       | 851.8667       |                                         |                                         |
|               | +32                 | 878.4926       | 878.4563       |                                         |                                         |
|               | +31                 | 906.7825       | 906.7613       |                                         |                                         |
|               | +30                 | 936.9825       | 936.9533       |                                         |                                         |
|               | +29                 | 969.2562       | 969.2276       |                                         |                                         |
|               | +28                 | 1,003.8416     | 1,003.8071     |                                         |                                         |
|               | +27                 | 1,040.9965     | 1,040.9481     |                                         |                                         |

**Supplemental Table 3: Mass Table for Supplemental Figure 3**  
 – Albumin from a healthy donor after 60 days at -20 °C. Only the *m/z* values corresponding to the base peak in the charge deconvoluted spectrum are shown.

|                |                     | Observed       | Calculated     | Observed                                | Calculated                              |
|----------------|---------------------|----------------|----------------|-----------------------------------------|-----------------------------------------|
|                | <i>Charge State</i> | <i>Raw m/z</i> | <i>Raw m/z</i> | <i>Deconvoluted MH<sup>+</sup> Mass</i> | <i>Deconvoluted MH<sup>+</sup> Mass</i> |
| <b>Albumin</b> | +64                 | 1,039.0976     | 1,039.0922     | <b>66,439.1</b>                         | <b>66,438.9</b>                         |
|                | +63                 | 1,055.5643     | 1,055.5698     |                                         |                                         |
|                | +62                 | 1,072.5625     | 1,072.5790     |                                         |                                         |
|                | +61                 | 1,090.1465     | 1,090.1459     |                                         |                                         |
|                | +60                 | 1,108.3033     | 1,108.2983     |                                         |                                         |
|                | +59                 | 1,127.0590     | 1,127.0661     |                                         |                                         |
|                | +58                 | 1,146.4920     | 1,146.4810     |                                         |                                         |
|                | +57                 | 1,166.5926     | 1,166.5772     |                                         |                                         |
|                | +56                 | 1,187.3840     | 1,187.3911     |                                         |                                         |
|                | +55                 | 1,208.9827     | 1,208.9618     |                                         |                                         |
|                | +54                 | 1,231.3319     | 1,231.3315     |                                         |                                         |
|                | +53                 | 1,254.5481     | 1,254.5453     |                                         |                                         |
|                | +52                 | 1,278.6460     | 1,278.6519     |                                         |                                         |
|                | +51                 | 1,303.6930     | 1,303.7039     |                                         |                                         |
|                | +50                 | 1,329.7656     | 1,329.7580     |                                         |                                         |
|                | +49                 | 1,356.8821     | 1,356.8755     |                                         |                                         |
|                | +48                 | 1,385.1356     | 1,385.1229     |                                         |                                         |
|                | +47                 | 1,414.5951     | 1,414.5723     |                                         |                                         |
|                | +46                 | 1,445.3325     | 1,445.3022     |                                         |                                         |
|                | +45                 | 1,477.4243     | 1,477.3978     |                                         |                                         |
|                | +44                 | 1,510.9507     | 1,510.9523     |                                         |                                         |
|                | +43                 | 1,546.0798     | 1,546.0674     |                                         |                                         |
|                | +42                 | 1,582.8689     | 1,582.8548     |                                         |                                         |
|                | +41                 | 1,621.4249     | 1,621.4366     |                                         |                                         |
|                | +40                 | 1,661.9561     | 1,661.9475     |                                         |                                         |
|                | +39                 | 1,704.5380     | 1,704.5359     |                                         |                                         |
|                | +38                 | 1,749.3688     | 1,749.3658     |                                         |                                         |
|                | +37                 | 1,796.6358     | 1,796.6189     |                                         |                                         |
| +36            | 1,846.5239          | 1,846.4972     |                |                                         |                                         |
| +35            | 1,899.2072          | 1,899.2257     |                |                                         |                                         |
| +34            | 1,955.0347          | 1,955.0559     |                |                                         |                                         |
| +33            | 2,014.3156          | 2,014.2697     |                |                                         |                                         |
| +32            | 2,077.1643          | 2,077.1844     |                |                                         |                                         |
| +31            | 2,144.1838          | 2,144.1581     |                |                                         |                                         |

**Supplemental Table 4:** Mass Table for Supplemental Figure 4 – ApoA-I at from a healthy donor after 11 days at 25 °C. Only the *m/z* values corresponding to the base peak in the charge deconvoluted spectrum are shown.

|               |                     | Observed       | Calculated     | Observed                                | Calculated                              |
|---------------|---------------------|----------------|----------------|-----------------------------------------|-----------------------------------------|
|               | <i>Charge State</i> | <i>Raw m/z</i> | <i>Raw m/z</i> | <i>Deconvoluted MH<sup>+</sup> Mass</i> | <i>Deconvoluted MH<sup>+</sup> Mass</i> |
| <b>ApoA-I</b> | +37                 | 760.3156       | 760.3135       | <b>28,096.3</b>                         | <b>28,095.6</b>                         |
|               | +36                 | 781.4401       | 781.4056       |                                         |                                         |
|               | +35                 | 803.6990       | 803.7029       |                                         |                                         |
|               | +34                 | 827.3394       | 827.3118       |                                         |                                         |
|               | +33                 | 852.3936       | 852.3515       |                                         |                                         |
|               | +32                 | 878.9726       | 878.9563       |                                         |                                         |
|               | +31                 | 907.3103       | 907.2774       |                                         |                                         |
|               | +30                 | 937.4766       | 937.4867       |                                         |                                         |
|               | +29                 | 969.8069       | 969.7793       |                                         |                                         |
|               | +28                 | 1,004.4410     | 1,004.3786     |                                         |                                         |

**Supplemental Table 5:** Mass Table for Supplemental Figure 5 – ApoA-I at from a healthy donor after 4 years of unknown “frozen” storage conditions. Only the *m/z* values corresponding to the base peak in the charge deconvoluted spectrum are shown.

|               |                     | Observed       | Calculated     | Observed                                | Calculated                              |
|---------------|---------------------|----------------|----------------|-----------------------------------------|-----------------------------------------|
|               | <i>Charge State</i> | <i>Raw m/z</i> | <i>Raw m/z</i> | <i>Deconvoluted MH<sup>+</sup> Mass</i> | <i>Deconvoluted MH<sup>+</sup> Mass</i> |
| <b>ApoA-I</b> | +37                 | 760.7210       | 760.7459       | <b>28,111.5</b>                         | <b>28,111.6</b>                         |
|               | +36                 | 781.8752       | 781.8500       |                                         |                                         |
|               | +35                 | 804.1406       | 804.1600       |                                         |                                         |
|               | +34                 | 827.7999       | 827.7824       |                                         |                                         |
|               | +33                 | 852.8060       | 852.8364       |                                         |                                         |
|               | +32                 | 879.4447       | 879.4563       |                                         |                                         |
|               | +31                 | 907.7673       | 907.7935       |                                         |                                         |
|               | +30                 | 938.0634       | 938.0200       |                                         |                                         |
|               | +29                 | 970.3279       | 970.3310       |                                         |                                         |
|               | +28                 | 1,004.9485     | 1,004.9500     |                                         |                                         |
|               | +27                 | 1,042.1198     | 1,042.1333     |                                         |                                         |
|               | +26                 | 1,082.1860     | 1,082.1769     |                                         |                                         |
|               | +25                 | 1,125.4339     | 1,125.4240     |                                         |                                         |
|               | +24                 | 1,172.3009     | 1,172.2750     |                                         |                                         |
|               | +23                 | 1,223.2221     | 1,223.2000     |                                         |                                         |
| +22           | 1,278.6884          | 1,278.7545     |                |                                         |                                         |

**Supplemental Table 6:** Basic clinical information of patients with myocardial infarction (n = 24). Twelve patients were male and twelve were female.

| Demographics | Mean | SE (+/-) |
|--------------|------|----------|
| Age (years)  | 60.1 | 11.2     |
| Height (cm)  | 167  | 10.9     |
| Weight (kg)  | 94.7 | 24.0     |
| BMI %        | 33.5 | 7.23     |



**Supplemental Table 7:** Clinical laboratory measurements of patients with myocardial infarction (n = 24)

| Laboratory parameters     | Mean | SE (+/-) |
|---------------------------|------|----------|
| HDL (mg/dl)               | 42   | 8.7      |
| LDL (mg/dl)               | 101  | 42.7     |
| Total Cholesterol (mg/dl) | 175  | 45.6     |
| Triglycerides (mg/dl)     | 163  | 72.6     |
| CPK-MB (mg/dl)            | 45   | 127      |
| Troponin I (ng/ml)        | 2.9  | 9.4      |
| Creatinine (mg/dl)        | 1.1  | 0.42     |
| HbA1c (only diabetics)    | 8.5  | 1.3      |
| Systolic BP (mmHg)        | 136  | 33       |
| Diastolic BP (mmHg)       | 80   | 21       |
| HR                        | 74   | 12       |
| TIMI <sup>a</sup>         | 3.6  | 1.3      |

<sup>a</sup> Thrombolysis in Mycocardial Infarction risk score. Based on parameters described in: Antman, E. M., et al (2000) The TIMI risk score for unstable angina/non-ST elevation MI: A method for prognostication and therapeutic decision making. *JAMA* 284, 835-842

**Supplemental Table 8:** Clinical characteristics of prostate cancer patients (n = 24). All cases were diagnosed as adenocarcinoma. Twenty three subjects were white, one was African-American.

| Subject Parameter | Mean          | SE (+/-)             |
|-------------------|---------------|----------------------|
| Age (yrs)         | 62.7          | 5.7                  |
| Stage             | 2.1           | 0.34                 |
| Gleason Score     | (3.08 + 3.75) | (0.28 + 0.68, resp.) |
| PSA (ng/mL)       | 5.9           | 2.1                  |
